# Supplementary material for: Decoding the interplay between m6A modification and stress granule stability by live-cell imaging
Source: PubMed Central journal article supplement — Sci Adv. 2024 Nov 15;10(46):eadp5689. doi: 10.1126/sciadv.adp5689 (PMC11566999; doi:10.1126/sciadv.adp5689), 2024-11-15
Supplement: sciadv.adp5689_sm.pdf [file sciadv.adp5689_sm.pdf]

Supplementary Materials for  
**Decoding the interplay between m<sup>6</sup>A modification and stress granule stability  
by live-cell imaging**

Qianqian Li *et al.*

Corresponding author: Qin Peng, pengqin@szbl.ac.cn

*Sci. Adv.* **10**, eadp5689 (2024)  
DOI: 10.1126/sciadv.adp5689

**This PDF file includes:**

Figs. S1 to S7

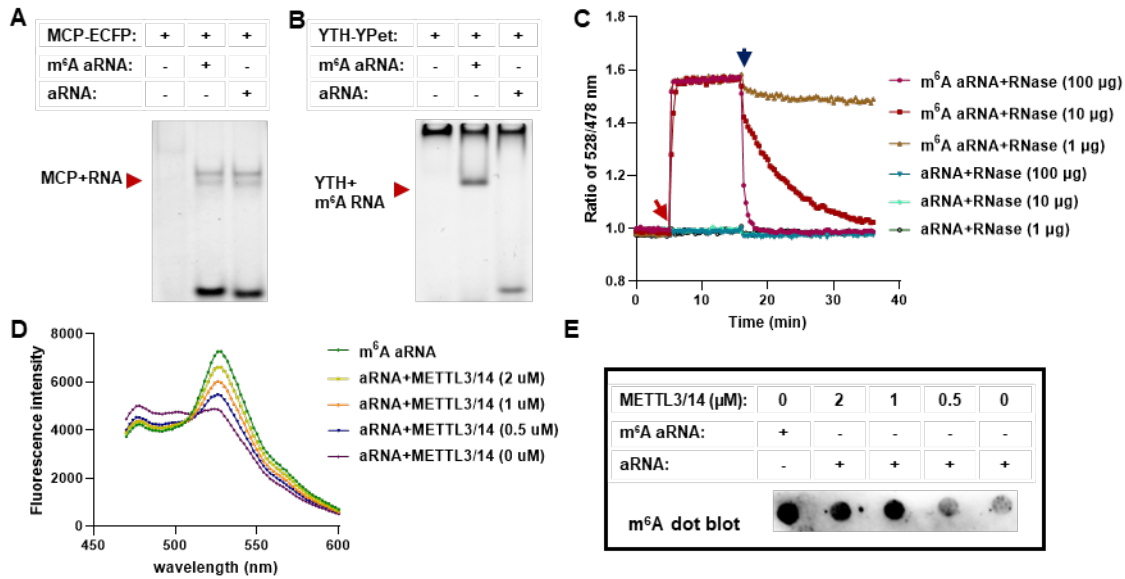

**Fig. S1.**

**Verification of the specificity of the FRET system *in vitro*.** **(A)** Gel red staining of native PAGE after MCP-ECFP was mixed with aRNA or m<sup>6</sup>A aRNA, 1: MCP-ECFP; 2: MCP-ECFP + m<sup>6</sup>A aRNA; 3: MCP-ECFP + aRNA; the arrow indicates the complex of MCP-ECFP with RNA. **(B)** Gel red staining of native PAGE after mixing YTH-YPet with aRNA or m<sup>6</sup>A aRNA; 1: YTH-YPet; 2: YTH-YPet + m<sup>6</sup>A aRNA; 3: YTH-YPet + aRNA; the arrow indicates the complex of YTH-YPet with m<sup>6</sup>A RNA. **(C)** Ratio of 528/478 nm fluorescence after mixing MCP-ECFP and YTH-YPet; the red arrow indicates the addition of aRNA or m<sup>6</sup>A aRNA, and the blue arrow indicates the addition of RNase at different concentrations. **(D)** Fluorescence spectrum after MCP-ECFP and YTH-YPet were mixed, aRNA or m<sup>6</sup>A aRNA were added for 20 min, and METTL3/14 was added at different concentrations for 12 hr. **(E)** m<sup>6</sup>A dot blot for **(D)**.

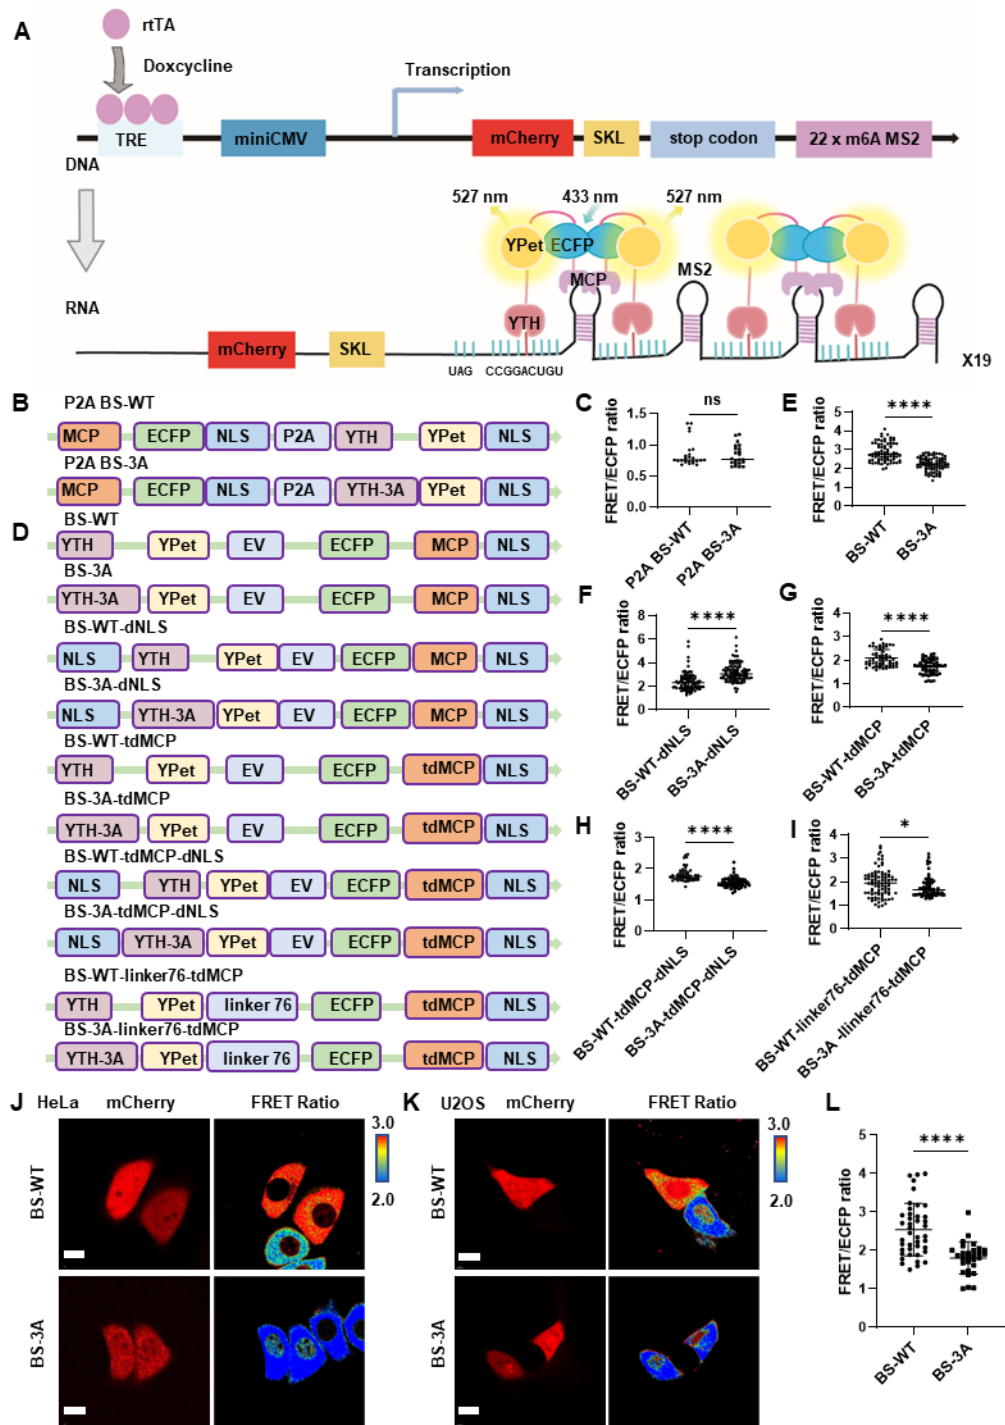

**Fig. S2.**

**Live-cell imaging of m<sup>6</sup>A modification with an mCherry reporter.** (A) Schematic diagram of live-cell FRET based on genetically coding reporter RNA with the mCherry and an intramolecular FRET biosensor. (B) Graphical images of intermolecular FRET BS with P2A that simultaneously express MCP-ECFP-NLS and YTH-YPet-NLS or YTH-3A-Ypet-NLS. (C) FRET ratio after transient transfection of HeLa cells with

the mCherry reporter plasmid and P2A BS-WT or P2A BS-3A biosensor for 36 hr and DOX induction for 6 hr; unpaired *t* test with Welch's correction, P2A BS-WT: n=25; P2A BS-3A: n=22,  $p=0.7292$ . **(D)** Graphical images of various FRET biosensors. tdMCP indicates a tandem MCP, and linker 76 indicates a semiflexible linker with 76 amino acids. The FRET ratio after transient transfection of HeLa cells with the mCherry reporter plasmid and biosensors **(E)**, BS-WT: n=77, BS-3A: n=81,  $p<0.0001$ ), double NLS (dNLS, **F**, n=92,  $p<0.0001$ ), tdMCP (**G**, BS-WT: n=61, BS-3A: n=55,  $p<0.0001$ ), dNLS + tdMCP (**H**, BS-WT: n=50, BS-3A: n=63,  $p<0.0001$ ), or tdMCP + linker76 (**I**, BS-WT: n=90, BS-3A: n=63,  $p<0.0001$ ) for 36 hr and DOX induction for 6 hr, all the data were analyzed by unpaired *t* test with Welch's correction. **(J)** Representative images of mCherry and the FRET/ECFP ratio for **(E)**; scale bar: 15  $\mu\text{m}$ . **(K)** Representative images of mCherry and the FRET/ECFP ratio after transient transfection of U2OS cells with the mCherry reporter RNA plasmid and BS-WT or BS-3A biosensor for 36 hr and DOX induction for 6 hr; scale bar: 15  $\mu\text{m}$ . **(L)** FRET/ECFP ratio for **(K)**, unpaired *t* test with Welch's correction, BS-WT: n=42, BS-3A: n=29,  $p<0.0001$ . *ns*: not significant.

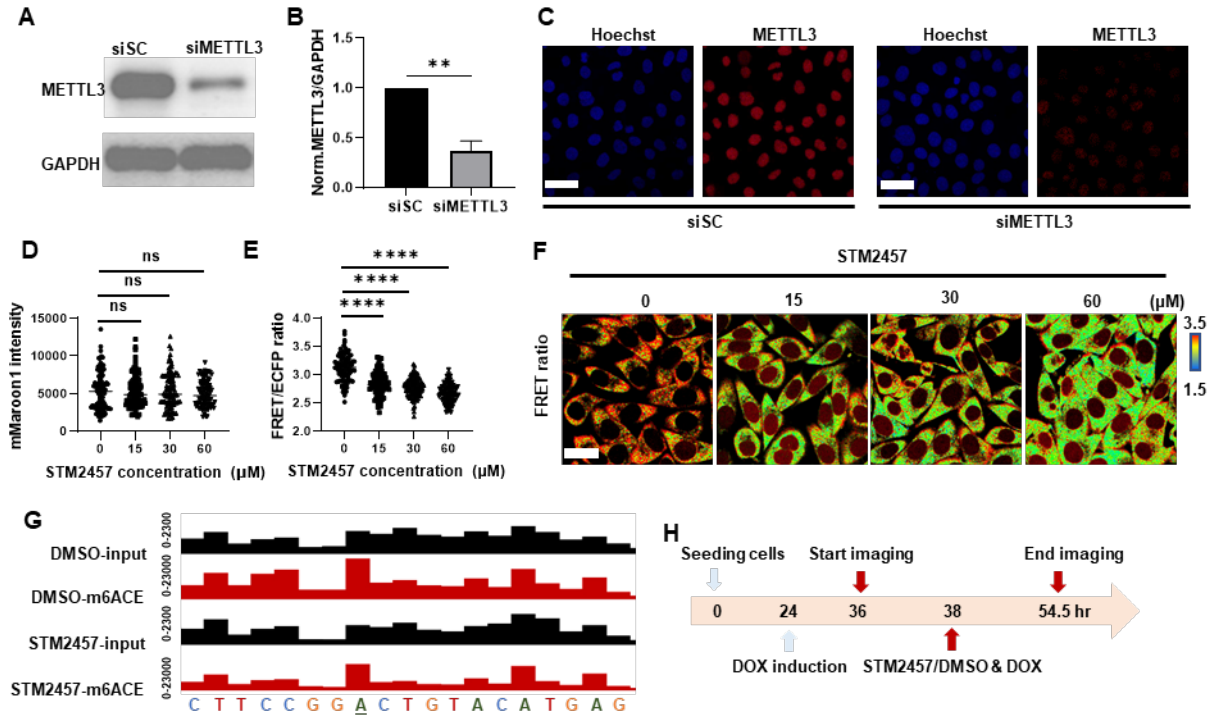

**Fig. S3.**

**siMETTL3 and inhibitor STM2457 efficiently reduced METTL3 level and activity.** (A) Western blot of GAPDH and METTL3 after siSC and siMETTL3 treatment. (B) Normalized METTL3/GAPDH expression in HeLa cells after siRNA treatment; unpaired *t* test with Welch's correction,  $n=3$ ,  $p=0.008$ . (C) METTL3 immunostaining after siSC and siMETTL3 treatment; scale bar: 50  $\mu\text{m}$ . (D) mMaroon1 intensity of SMIS-WT cells after pretreatment with indicated concentration of STM2457 for 3 hr and incubation with indicated concentration of STM2457 and DOX (1  $\mu\text{g}/\text{mL}$ ) for 12 hr, unpaired *t* test with Welch's correction,  $n=100$ , 15  $\mu\text{M}$  group:  $p=0.7769$ ; 30  $\mu\text{M}$  group:  $p=0.7714$ ; 60  $\mu\text{M}$  group:  $p=0.2341$ . (E) FRET ratio of SMIS-WT cells after pretreatment with indicated concentration of STM2457 for 3 hr and incubation with indicated concentration of STM2457 and DOX (1  $\mu\text{g}/\text{mL}$ ) for 12 hr, unpaired *t* test with Welch's correction,  $n=100$ ,  $p<0.0001$ . (F) Representative FRET images of SMIS-WT cells after pretreatment with indicated concentration of STM2457 for 3 hr and incubation with indicated concentration of STM2457 and DOX (1  $\mu\text{g}/\text{mL}$ ) for 12 hr, scale bar: 20  $\mu\text{m}$ . (G) m6ACE (red) and Input (black) read-start counts (in reads per million mapped or RPM) mapped to mMaroon1 reporter gene, showed as zoom-in view, the peak count range of input and m6ACE is 0-2300 and 0-23000, respectively, m<sup>6</sup>A site is marked with an underline. (H) FRET imaging procedure of SMIS-WT cells after STM2457 or DMSO treatment. Specifically, SMIS-WT cells was induced by DOX for 14 hours before treatment with STM2457/DMSO and DOX for another 16.5 hr. The FRET imaging started at 36 hr and ended at 54.5 hr.

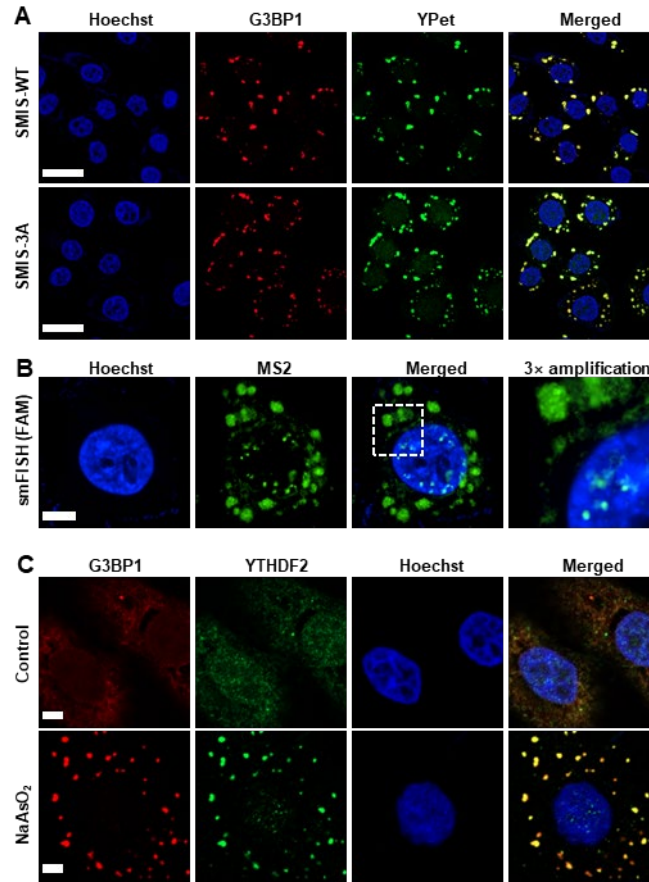

**Fig. S4.**

**mMaroon1 reporter RNA is enriched in SGs.** (A) G3BP1 immunostaining images and YPet images of SMIS-WT and SMIS-3A cells after DOX induction for 12 hr and NaAsO<sub>2</sub> treatment for 1 hr; scale bar: 50  $\mu$ m. (B) smFISH of reporter mRNA in m<sup>6</sup>A reporter cells after DOX induction for 12 hr and NaAsO<sub>2</sub> treatment for 1 hr; scale bar: 5  $\mu$ m. The white square with dashed lines indicates the region for 3 $\times$  amplification; antisense DNA oligo for smFISH: FAM-GACATGGGTGATCCTCATGT-FAM. (C) G3BP1 and YTHDF2 immunostaining images of HeLa cells after NaAsO<sub>2</sub> treatment for 1 hr; scale bar: 5  $\mu$ m.

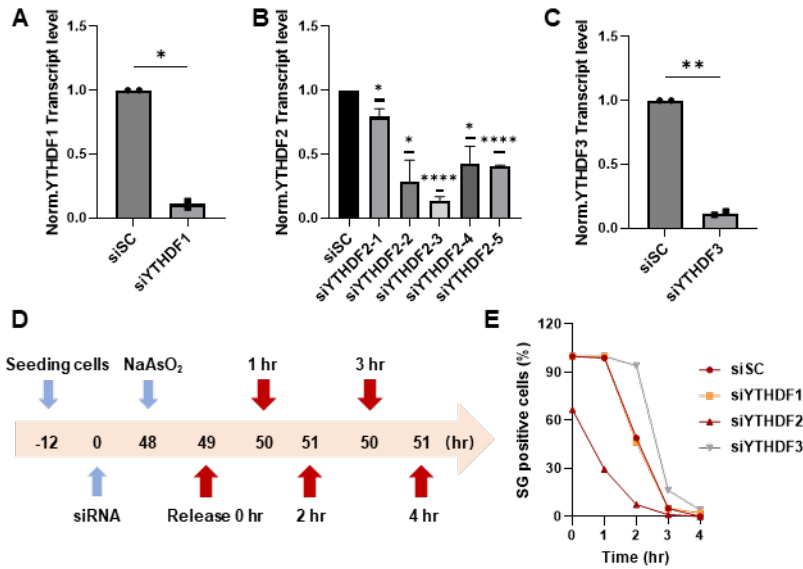

**Fig. S5.**

**Screening siRNAs for YTHDFs to regulate SG disassembly.** The normalized transcript level of YTHDF1 (A), YTHDF2 (B), and YTHDF3 (C) after siRNA treatment; unpaired *t* test with Welch's correction, siYTHDF1,  $n=2$ ,  $p=0.0179$ ; siYTHDF2-1,  $n=3$ ,  $p=0.028$ ; siYTHDF2-2,  $n=3$ ,  $p=0.0176$ ; siYTHDF2-3,  $n=3$ ,  $p<0.0001$ ; siYTHDF2-4,  $n=3$ ,  $p=0.0179$ ; siYTHDF2-5,  $n=3$ ,  $p<0.0001$  and siYTHDF3,  $n=2$ ,  $p=0.0094$ . (D) The workflow of G3BP1 immunostaining in HeLa cells after siRNA treatment during SG formation and disassembly. (E) The percentage of SG-positive HeLa cells during SG recovery following the workflow of (D).

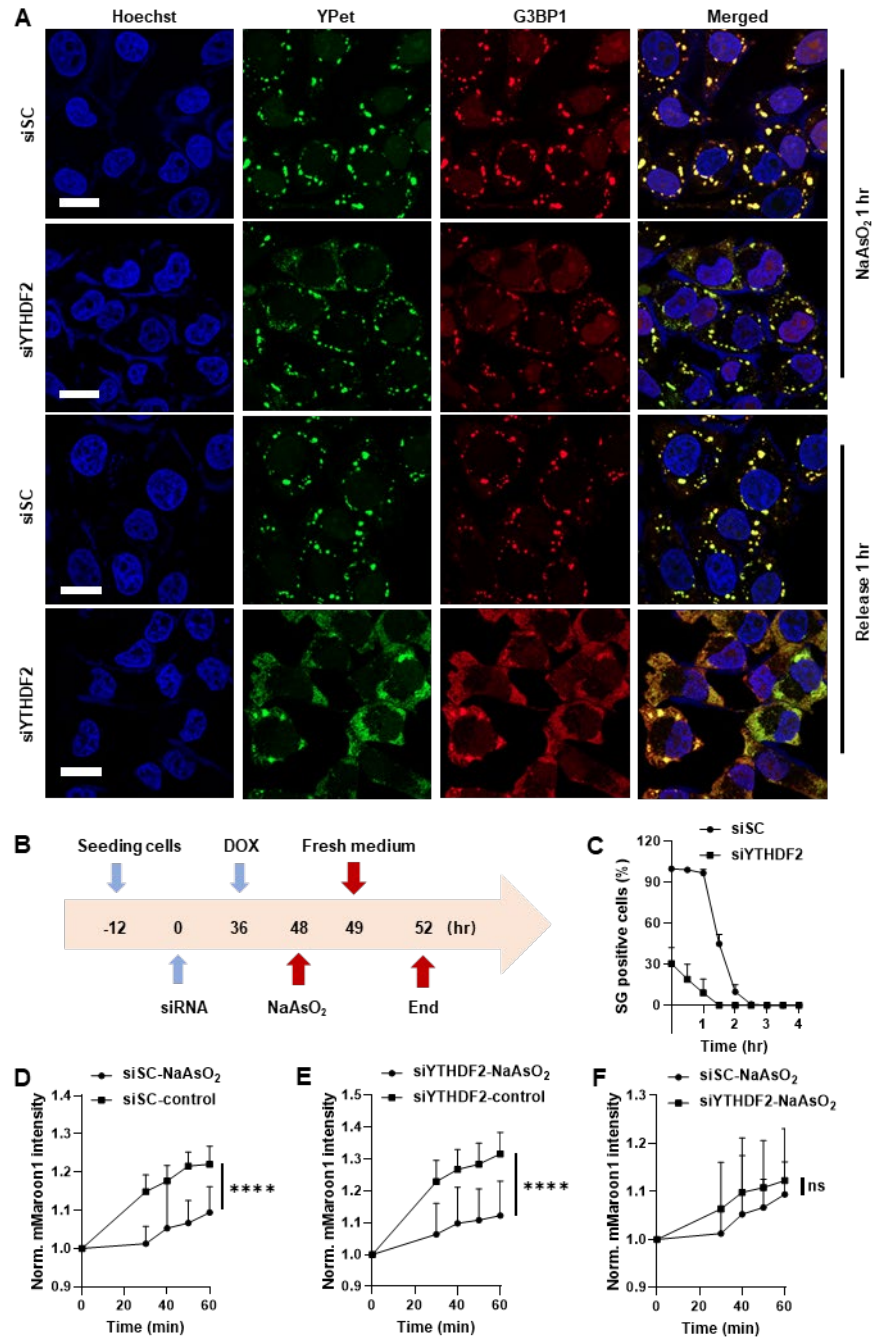

**Fig. S6.**

**SMIS was used to monitor the SG dynamics and translation of mMaroon1 after YTHDF2 knockdown. (A)** G3BP1 immunostaining and YPet images of the SMIS-WT after siSC or siYTHDF2 treatment for 36 hr, DOX induction for 12 hr, NaAsO<sub>2</sub> treatment for 1 hr and release for 1 hr; scale bar: 20  $\mu$ m. **(B)** The workflow of time-lapse imaging of SG formation and disassembly. First, the SMIS-WT cells were seeded on glass bottom dishes for 12 hr, transfected with siRNAs for 36 hr, treated with fresh medium supplemented with 1  $\mu$ g/mL DOX and siRNAs for another 12 hr, then change the media and incubated with fresh medium supplemented with 0.5 mM NaAsO<sub>2</sub> for 1 hr, and then washed out NaAsO<sub>2</sub> and incubated with fresh medium and siRNAs for 3 hr. The imaging started from the beginning of the NaAsO<sub>2</sub> treatment



(t=48 hr) and continued to the end (t=52 hr). **(C)** Percentage of SG-positive SMIS-WT cells after siRNA treatment and release from NaAsO<sub>2</sub>; n=4. **(D)** mMaroon1 intensity normalized to that at 0 min after NaAsO<sub>2</sub> addition or without treatment in SMIS-WT cells after siSC treatment; unpaired *t* test with Welch's correction, n=30, *p*<0.0001. **(E)** mMaroon1 intensity normalized to that at 0 min after NaAsO<sub>2</sub> addition or without treatment in SMIS-WT cells after siYTHDF2 treatment; unpaired *t* test with Welch's correction, n=30, *p*<0.0001. **(F)** mMaroon1 intensity was normalized to that at 0 min after NaAsO<sub>2</sub> addition to SMIS-WT cells after siSC or siYTHDF2 treatment for 36 hr, DOX induction for 12 hr and NaAsO<sub>2</sub> treatment (unpaired *t* test with Welch's correction, n=30, *p*=0.225). *ns*: not significant.

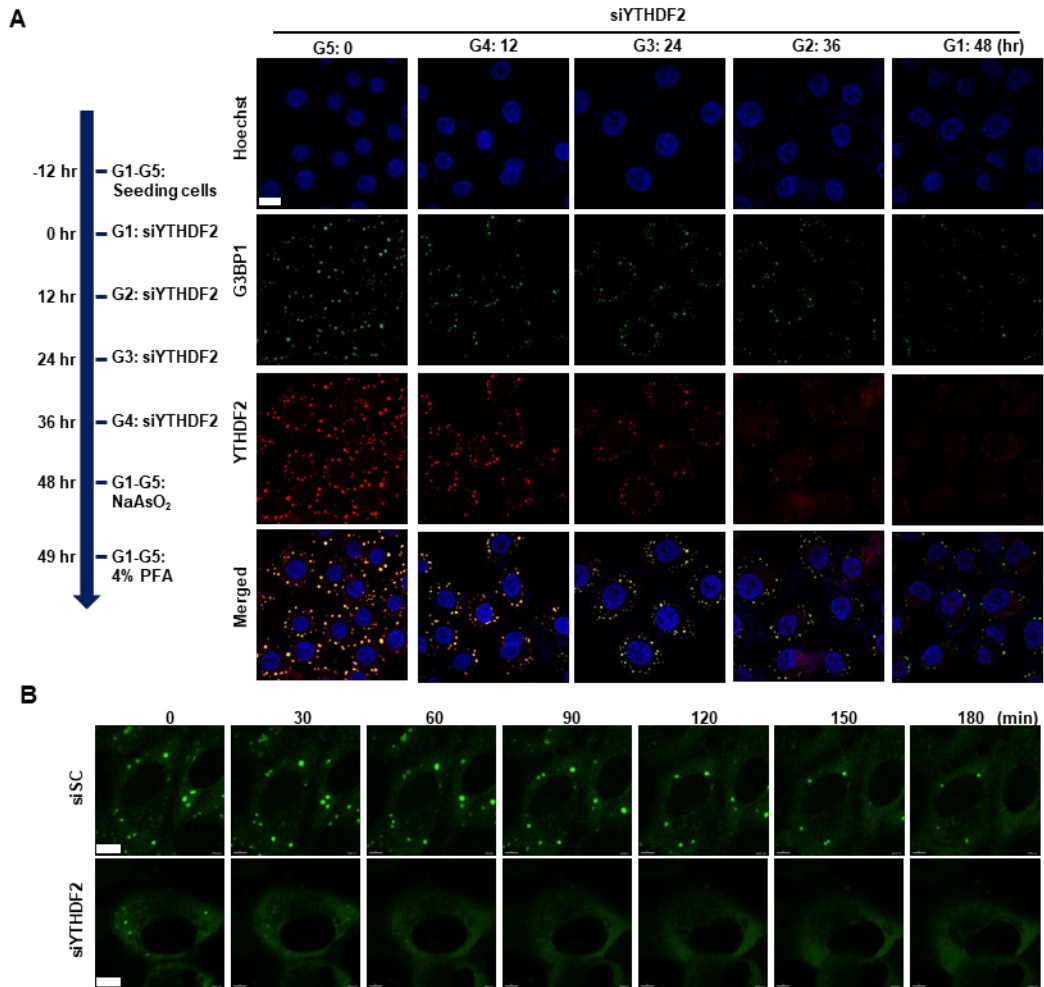

**Fig. S7.**

**Highly efficient YTHDF2 knockdown reduces SG stability. (A)** YTHDF2 and G3BP1 immunostaining in HeLa cells after siYTHDF2 treatment at the indicated time points; scale bar: 20  $\mu$ m; G1-G5: G1-5 in which cells are treated with siYTHDF2 for 48, 36, 24, 12, and 0 hr, respectively. **(B)** Live-cell imaging of G3BP1-EGFP in U2OS cells during NaAsO<sub>2</sub> release after siSC or siYTHDF2 treatment; scale bar: 20  $\mu$ m.
